## CORRECTION

## Correction: Exploring cell and tissue mechanics with optical tweezers

Frederic Català-Castro, Erik Schäffer and Michael Krieg

There was an error in *J. Cell Sci.* (2022) **135**, jcs259355 (doi:10.1242/jcs.259355).

The images in Fig. 1E,F show inverted orange and blue colours for the  $G'$  (storage) and  $G''$  (loss) labels. The journal apologises to the authors and readers for this error, which occurred during production of the figure.

The corrected and original figure panels are shown below.

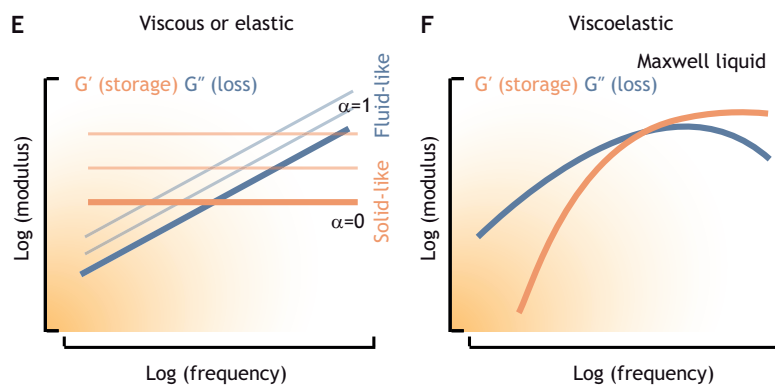

**Fig. 1E,F (corrected panels). Measuring and understanding cell mechanics with optical tweezer force curves.** (E) Rheological spectrum of a viscous or elastic material. Probing the strain response of a material as a function of frequency provides information about the storage ( $G'$ , elastic contribution) and loss ( $G''$ , viscous contribution) moduli. In a log–log plot, the slope is equal to the power-law exponent  $\alpha$ , indicative for viscous or elastic behavior, while the pre-factor scales with the magnitude of the material property. A change in prefactor leads to a shift along the y-axis, without affecting the slope, indicating a change in modulus. See Staunton et al., 2019 for the outcome of a typical experiment. (F) Spectrum of a viscoelastic (Maxwell) material. For low frequencies, loss dominates, as a Maxwell material cannot sustain stress, it flows. A typical example can be found in Jawerth et al., 2020.

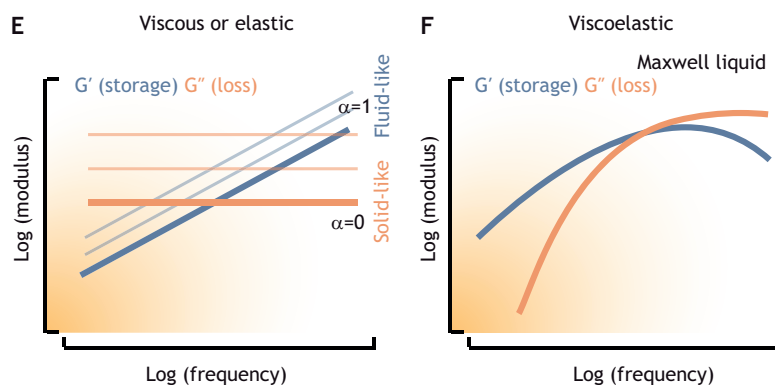

**Fig. 1E,F (original panels). Measuring and understanding cell mechanics with optical tweezer force curves.** (E) Rheological spectrum of a viscous or elastic material. Probing the strain response of a material as a function of frequency provides information about the storage ( $G'$ , elastic contribution) and loss ( $G''$ , viscous contribution) moduli. In a log–log plot, the slope is equal to the power-law exponent  $\alpha$ , indicative for viscous or elastic behavior, while the pre-factor scales with the magnitude of the material property. A change in prefactor leads to a shift along the y-axis, without affecting the slope, indicating a change in modulus. See Staunton et al., 2019 for the outcome of a typical experiment. (F) Spectrum of a viscoelastic (Maxwell) material. For low frequencies, loss dominates, as a Maxwell material cannot sustain stress, it flows. A typical example can be found in Jawerth et al., 2020.

This figure has been corrected in the online and PDF versions of the paper.
